# Supplementary material
Source: publisher figshare collection journal article supplement (https://sage.figshare.com/ndownloader/files/21268209)
Supplement: Supplementary file 1 [file 21268209]

## Appendix

### Appendix A: Main Categories, Categories, and Sub-categories with Anchor Examples

| Main categories, categories, and sub-categories              | Anchor examples (translations by the authors)                                                                                        |
|--------------------------------------------------------------|--------------------------------------------------------------------------------------------------------------------------------------|
| <b>Conflicts over political norms ("Doxa")</b>               |                                                                                                                                      |
| Political stances                                            | "Different opinions"                                                                                                                 |
| <i>Differences in political views and interpretation</i>     | "Political-ideological reasons: Divergent views"                                                                                     |
| <i>Ideological tagging / prejudices against interlocutor</i> | "Journalists have negative prejudices against those people who do not hold the same world view as they do."                          |
| <i>Journalists' own political agenda</i>                     | "When journalists want to make politics themselves"                                                                                  |
| Political bias in news coverage                              | "Anger over the tendency in which journalists write"                                                                                 |
| <i>One-sidedness, partisan slant</i>                         | "One-sided reporting"                                                                                                                |
| <i>Attacks and defamation</i>                                | "The only actual cause of conflict is the dissemination of defamatory or false statements about people"                              |
| <i>Interpretation of facts</i>                               | "Facts are reproduced incorrectly and inaccurately"                                                                                  |
| Lack of political knowledge (of journalists)                 | "Lack of specialist knowledge of journalists"                                                                                        |
| <b>Conflicts over journalistic norms ("Doxa")</b>            |                                                                                                                                      |
| News coverage                                                | "Dissatisfaction with news coverage"                                                                                                 |
| <i>Exaggeration and dramatization</i>                        | "Because the journalistic shortening and aggravation lead to unreflected representations that rarely correspond to reality."         |
| <i>Private life dragged to public eye</i>                    | "When journalists invade the private sphere of politicians."                                                                         |
| <i>Scandalization and negative coverage</i>                  | "Allegations, alleged personal scandals"                                                                                             |
| <i>Importance of politics and political actors</i>           | "Concrete ideas of politicians, he is not featured enough"                                                                           |
| <i>Superficiality, short reports</i>                         | "Shortened presentation"                                                                                                             |
| News making process                                          | "No understanding of journalistic logic"                                                                                             |
| <i>Ignoring politicians as sources</i>                       | "If there is no enquiry on a subject"                                                                                                |
| <i>Lack of appreciation of politicians</i>                   | "Politicians feel badly treated or ignored"                                                                                          |
| <i>Use of quotations and interviews</i>                      | "Politicians make statements that they later relativize with reference to having been misquoted."                                    |
| <i>Behavior in interview</i>                                 | "When journalists ask normal questions, which are perceived as insubordinate by politicians."                                        |
| <i>Selection of events</i>                                   | "Because journalists always want to be ahead of the times and want to report on decisions that are not yet final (e.g. Eurofighter)" |
| <i>Information policy towards journalists</i>                | "Selective information policy"                                                                                                       |
| Journalistic roles                                           | "False conception of the work journalists do"                                                                                        |
| <i>Professionalism of journalists</i>                        | "Poor education of journalists"                                                                                                      |
| <i>Lack of cooperation among journalists</i>                 | "Unwillingness to cooperate"                                                                                                         |

|                                                  |                                                                                                                             |
|--------------------------------------------------|-----------------------------------------------------------------------------------------------------------------------------|
| <i>Attitude of journalists</i>                   | “Tough competitive pressure between journalists in Berlin leads to tougher customs and aggressive attitude of journalists”  |
| Journalistic manipulation                        | “Fake reports, journalist wasn’t there.”                                                                                    |
| <i>Violating the off-the-record rule</i>         | “Breach of previously agreed confidentiality”                                                                               |
| <i>False quotes / “Fake News”</i>                | “A matter of dishonesty, putting something in the politician’s mouth that he has never said”                                |
| <i>Ethical issues</i>                            | “Journalists do not work honestly.”                                                                                         |
| Economic interests and pressures                 | “Economic interests”                                                                                                        |
| <i>Exclusivity demands</i>                       | “The promise of exclusive information that is distributed to 15 colleagues or competitors at the same time”                 |
| <i>Orientation toward audience ratings</i>       | “Orientation towards reaches”                                                                                               |
| <i>Competition among media</i>                   | “Competitive pressure”                                                                                                      |
| <b>Autonomy of journalism</b>                    |                                                                                                                             |
| Lack of respect for journalist autonomy          | “Because politicians want journalists to dance to their tune.”                                                              |
| (Attempts at) instrumentalization of journalists | “The attempt of politicians to influence journalists”                                                                       |
| Collusion between politicians and journalists    | “Too close relations between pol. and jour.”                                                                                |
| Links between politicians and media owners       | “Intervention with the head of the journalist”                                                                              |
| Independence of journalists from media owners    | “J.’s dependence on the respective media owner”                                                                             |
| <b>Personalities</b>                             |                                                                                                                             |
| Trust and reliability                            | “Lack of mutual trust”                                                                                                      |
| Character, egos                                  | “Character of the politician”                                                                                               |
| Mixing professional and private life             | “Mixing work and private life, keyword: give and take. Very problematic!”                                                   |
| Career plans                                     | “If one notices that the reporting has caused damage, which could have an effect on the career progress of the politician.” |
